# Supplementary material
Source: ML conference proceedings conference paper supplement (https://openaccess.thecvf.com/content/WACV_2020/html/Griffin_Video_Object_Segmentation-based_WACV_2020_paper.html)
Supplement: Supplementary file 1 [file Griffin_Video_Object_Segmentation-based_WACV_2020_supplemental.pdf]

Archive with 8 entries (5 files):
- 0049-supp/
- 0049-supp/0049-supp.pdf
- __MACOSX/
- __MACOSX/0049-supp/
- __MACOSX/0049-supp/._0049-supp.pdf
- 0049-supp/0049-supp.mp4
- __MACOSX/0049-supp/._0049-supp.mp4
- __MACOSX/._0049-supp
