# Supplementary material
Source: ML conference proceedings conference paper supplement (https://openaccess.thecvf.com/content/WACV_2020/html/Griffin_Video_Object_Segmentation-based_WACV_2020_paper.html)
Supplement: Supplementary file 1 [file Griffin_Video_Object_Segmentation-based_WACV_2020_supplemental.pdf › 0049-supp/0049-supp.pdf]

# Supplementary Material for: Video Object Segmentation-based Visual Servo Control and Object Depth Estimation on a Mobile Robot

Brent A. Griffin

Victoria Florence

Jason J. Corso

University of Michigan

{griffb,vflorenc,jjcorso}@umich.edu

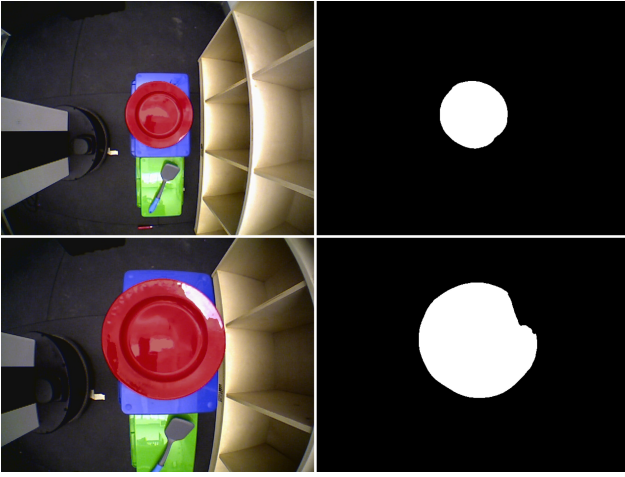

Figure 1. **Plate Segmentations used for Depth Estimation.** The plate is well-segmented from the higher camera position (top), but has greater spectral reflection as the camera approaches (bottom).

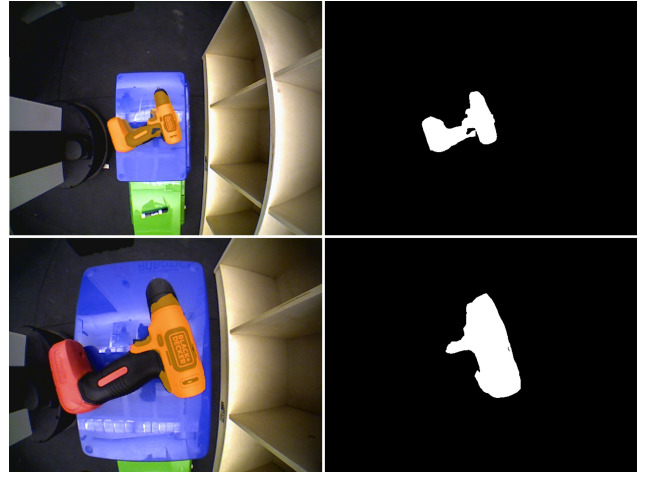

Figure 2. **Drill Segmentations used for Depth Estimation.** Portions of the drill become unsegmented at the closer view (bottom).

## Supplementary Material

**Segmentation Errors** Densely segmenting unstructured objects is a challenging problem, and, despite using state-of-the-art video object segmentation, we have some segmentation errors during our experiments. Figures 1-4 show segmentations used for depth estimation during the consecutive mobile robot trials in Section 7.4 of the paper. Even with some segmentation errors, VOS-VS centers on all four objects from the high-camera position and VOS-DE successfully estimates the depth of the plate and drill.

**Robot’s Perspective when Learning VOS-VS** Figure 5 shows the step-to-step visual servo transitions from the robot’s perspective as it is learning  $\hat{\mathbf{J}}_s^+$  for  $\mathbf{H}_{\text{base}}$  (corresponding to Figures 8-9 in the paper).

**Figures for Pick-and-place Experiments** Figure 6 shows a fully-automated pick-and-place task. Figure 7 shows a pick-and-place task with VOS-VS-based human collaboration.

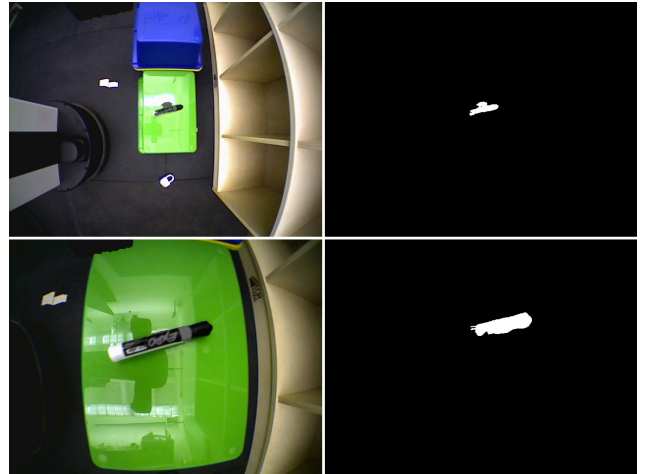

Figure 3. **Marker Segmentations used for Depth Estimation.** Reflective areas of the background are included as part of the marker segmentation at the higher view (top), then portions of the marker become unsegmented at the closer view (bottom).

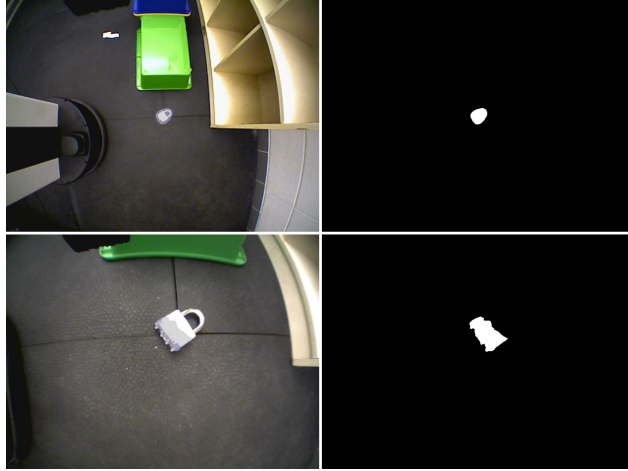

Figure 4. **Padlock Segmentations used for Depth Estimation.** The padlock segmentation goes from including small portions of the background (top) to leaving out large portions of the lock (bottom) as the camera approaches. Segmenting the padlock is difficult due to its small size and specular reflection, and depth estimation of the padlock is difficult due to erroneous changes in segmentation area.

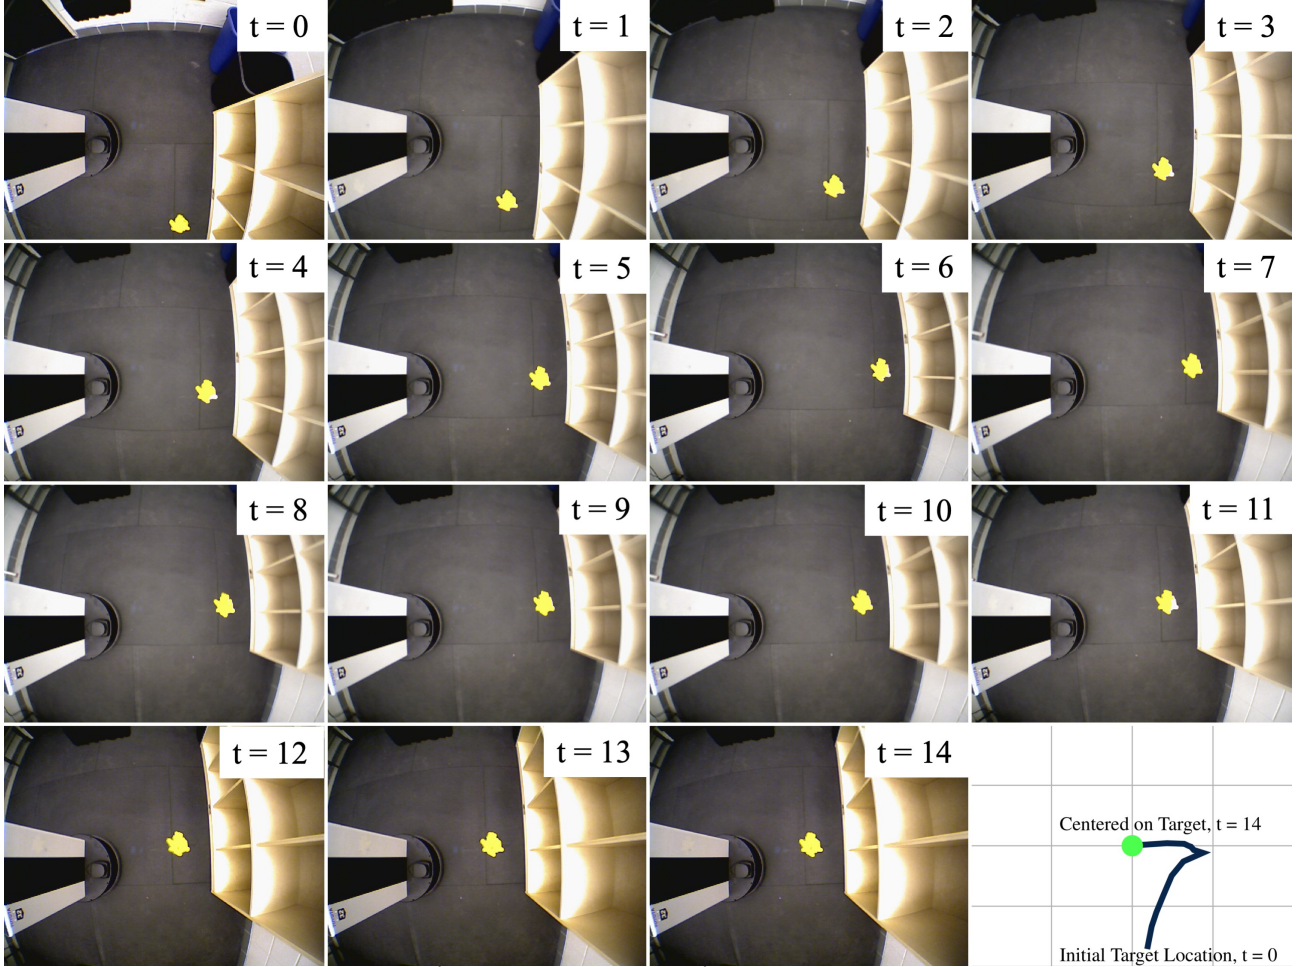

Figure 5. **Robot Perspective while Learning  $\hat{J}_s^+$  for  $H_{\text{base}}$ .** Starting with  $\hat{J}_s^+_{t=0}$  and offset target location (the yellow chain segmentation), our Hadamard-Broyden update learns the correct visual servoing parameters to center the robot on the target in real-time. The target is centered vertically after five updates ( $t = 5$ ) and horizontally after fourteen ( $t = 14$ ). We show the complete visual servo trajectory of the target object through image space on the bottom right. This figure corresponds with the experiment shown in Figures 8-9 of the paper.

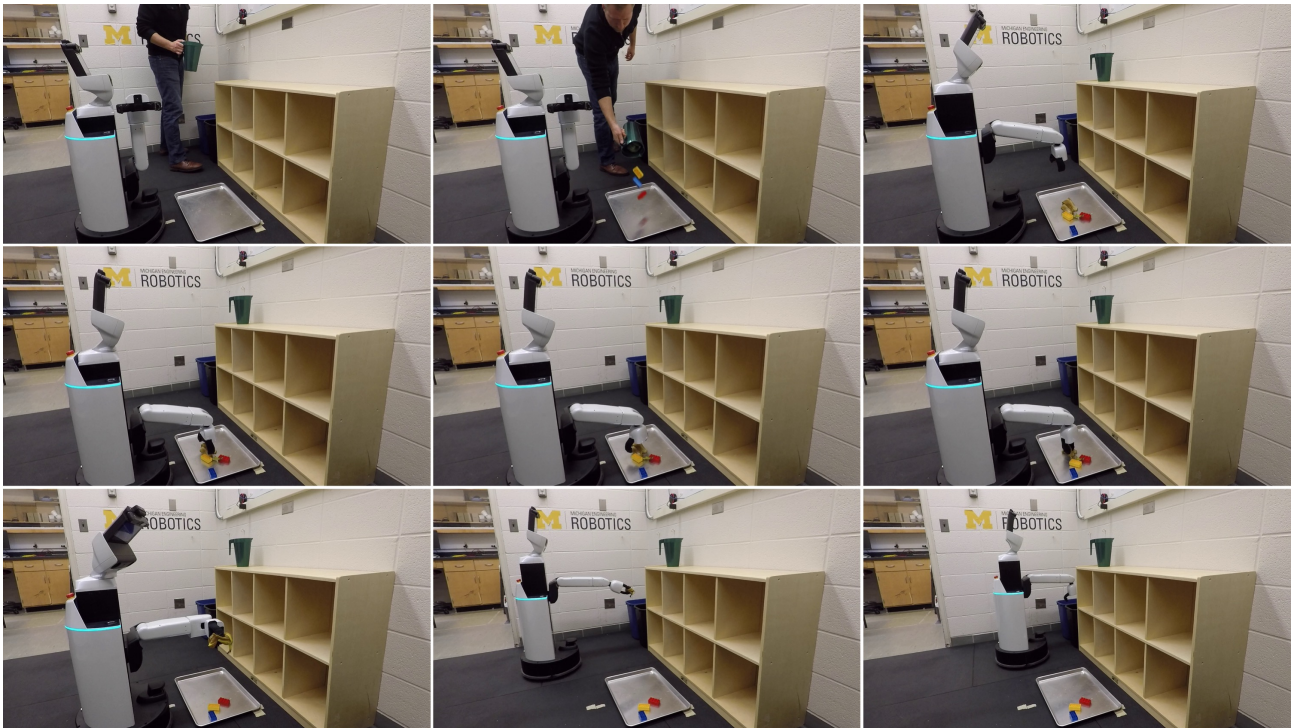

Figure 6. **HSR using VOS-VS and VOS-Grasp for Pick-and-place.** After a set of HSR challenge objects are randomly poured onto the metal tray, HSR identifies the initial object locations using the downward-facing grasp camera (top row). HSR identifies the banana peel as the first target, then centers on the peel amongst the cluttered objects using VOS-VS and then grasps the peel using VOS-Grasp (middle row). Finally, HSR performs a visual grasp check away from the other objects and then places the peel in the garbage bin (bottom row). All pick-and-place experiment and trial videos are available at: [https://www.youtube.com/playlist?list=PLz52BAn\\_JPx8nVgP2XfnG\\_9TCJj0DwC5y](https://www.youtube.com/playlist?list=PLz52BAn_JPx8nVgP2XfnG_9TCJj0DwC5y).

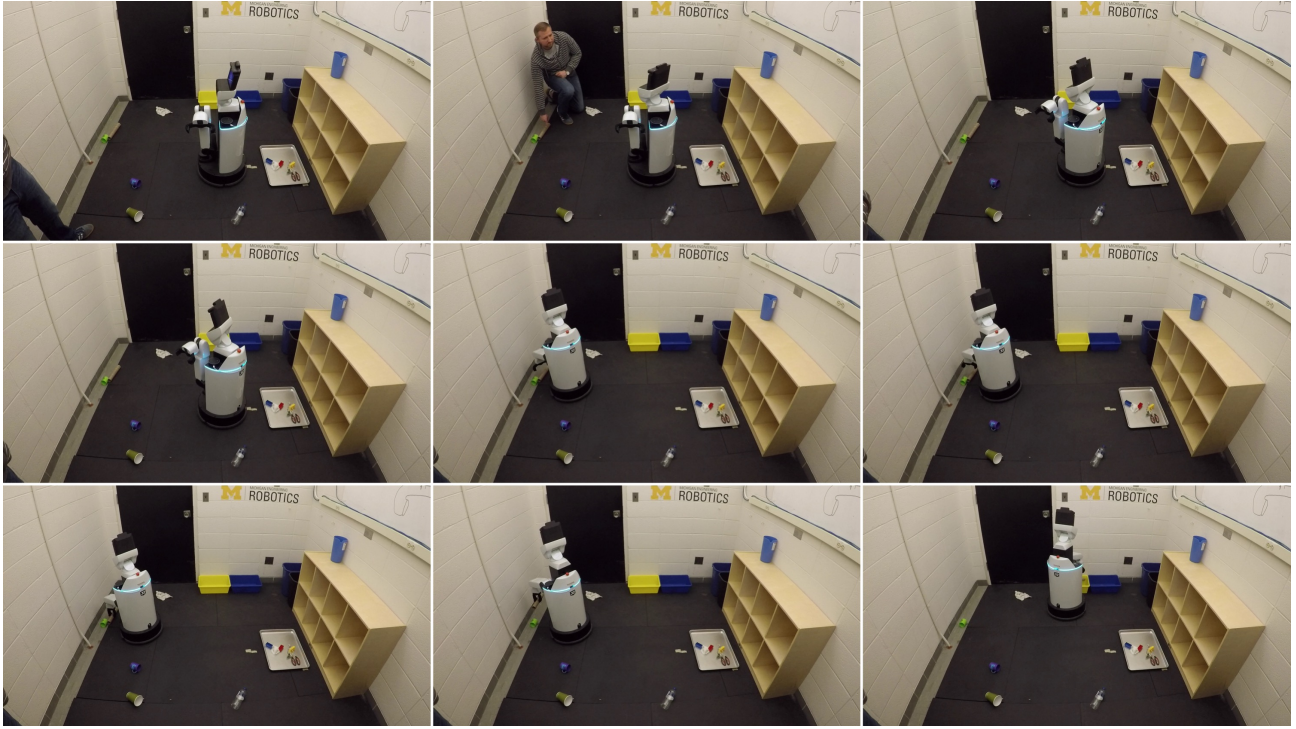

Figure 7. **Using VOS-VS for Human-Robot Collaboration.** HSR is asked to perform a pick-and-place task with the paper towel roll, but has no idea where it is. Using  $\mathbf{H}_{\text{head}}$  VOS-VS, HSR tracks the person so that he can show HSR where to find the roll (top row). Using  $\mathbf{H}_{\text{head}}$  VOS-VS again, HSR centers its gaze on the roll to locate it, then uses  $\mathbf{H}_{\text{base grasp}}$  to position itself for VOS-Grasp (middle row). Finally, HSR grasps the paper towel roll, verifies the grasp using our visual check, and then places the roll in the yellow bin (bottom row). All pick-and-place experiment and trial videos are available at: [https://www.youtube.com/playlist?list=PLz52BAn\\_JPx8nVgP2XfnG\\_9TCJj0DwC5y](https://www.youtube.com/playlist?list=PLz52BAn_JPx8nVgP2XfnG_9TCJj0DwC5y).
